# Supplementary material for: Evaluation of Agricultural Traits, Phytochemical Contents, and Antioxidant Activities in the Leaves of Amaranth Accessions of Nine Species
Source: MDPI journal article supplement (doi:10.3390/plants11131758), 2022-07-01
Supplement: s1 [file s1]

**Table S1.** Variations of biochemical contents and antioxidant activities in 289 Amaranth accessions according to seed coat, flower, and leaf colors.

| Morphological characters |                      | Values | TPC<br>( $\mu\text{g}\cdot\text{GAE}/\text{mg}\cdot\text{DE}$ ) | Rutin<br>( $\text{mg}/\text{g}$ ) | DPPH<br>( $\mu\text{g}\cdot\text{TE}/\text{mg}\cdot\text{DE}$ ) | ABTS<br>( $\mu\text{g}\cdot\text{TE}/\text{mg}\cdot\text{DE}$ ) |
|--------------------------|----------------------|--------|-----------------------------------------------------------------|-----------------------------------|-----------------------------------------------------------------|-----------------------------------------------------------------|
| Seed coat color          | Black                | Range  | 159.62–958.19                                                   | 0.12–40.42                        | 3.34–49.22                                                      | 75.20–449.61                                                    |
|                          |                      | Mean   | 457.44 <sup>a</sup>                                             | 8.65 <sup>b</sup>                 | 19.61 <sup>a</sup>                                              | 198.09 <sup>a</sup>                                             |
|                          |                      | CV (%) | 38.68                                                           | 93.47                             | 47.45                                                           | 26.32                                                           |
|                          | Brown                | Range  | 238.02–744.05                                                   | 1.14–42.30                        | 11.25–39.48                                                     | 139.62–255.41                                                   |
|                          |                      | Mean   | 460.16 <sup>a</sup>                                             | 14.25 <sup>a</sup>                | 23.77 <sup>a</sup>                                              | 190.61 <sup>a</sup>                                             |
|                          |                      | CV (%) | 29.05                                                           | 74.35                             | 36.13                                                           | 17.09                                                           |
|                          | Red                  | Range  | 508.83–738.78                                                   | 10.11–13.91                       | 18.17–35.67                                                     | 203.05–263.07                                                   |
|                          |                      | Mean   | 623.81 <sup>a</sup>                                             | 12.01 <sup>ab</sup>               | 26.92 <sup>a</sup>                                              | 233.06 <sup>a</sup>                                             |
|                          |                      | CV (%) | 26.07                                                           | 22.37                             | 45.97                                                           | 18.21                                                           |
|                          | Yellow               | Range  | 204.75–718.36                                                   | 0.75–33.79                        | 1.03–48.75                                                      | 96.97–351.45                                                    |
|                          |                      | Mean   | 444.32 <sup>a</sup>                                             | 13.57 <sup>a</sup>                | 21.09 <sup>a</sup>                                              | 212.01 <sup>a</sup>                                             |
|                          |                      | CV (%) | 28.99                                                           | 60.31                             | 46.02                                                           | 23.94                                                           |
| Flower color             | Brown                | Range  | 176.09–941.39                                                   | 0.61–31.58                        | 4.90–39.48                                                      | 100.95–449.61                                                   |
|                          |                      | Mean   | 429.19 <sup>ab</sup>                                            | 9.22 <sup>a</sup>                 | 17.71 <sup>b</sup>                                              | 192.76 <sup>ab</sup>                                            |
|                          |                      | CV (%) | 39.41                                                           | 105.22                            | 57.03                                                           | 36.55                                                           |
|                          | Green                | Range  | 159.62–958.19                                                   | 0.13–40.42                        | 3.34–48.75                                                      | 75.20–351.45                                                    |
|                          |                      | Mean   | 468.25 <sup>ab</sup>                                            | 9.33 <sup>a</sup>                 | 20.07 <sup>ab</sup>                                             | 192.12 <sup>ab</sup>                                            |
|                          |                      | CV (%) | 35.78                                                           | 82.04                             | 44.02                                                           | 22.27                                                           |
|                          | Red                  | Range  | 198.82–958.19                                                   | 0.12–42.30                        | 1.03–44.57                                                      | 92.80–360.05                                                    |
|                          |                      | Mean   | 427.48 <sup>b</sup>                                             | 10.39 <sup>a</sup>                | 20.20 <sup>ab</sup>                                             | 212.27 <sup>a</sup>                                             |
|                          |                      | CV (%) | 36.73                                                           | 81.34                             | 44.55                                                           | 25.37                                                           |
|                          | Yellow               | Range  | 244.61–727.25                                                   | 1.52–38.80                        | 4.43–49.22                                                      | 128.64–281.63                                                   |
|                          |                      | Mean   | 533.18 <sup>a</sup>                                             | 14.08 <sup>a</sup>                | 24.56 <sup>a</sup>                                              | 214.36 <sup>a</sup>                                             |
|                          |                      | CV (%) | 29.39                                                           | 80.03                             | 49.08                                                           | 21.29                                                           |
| Leaf color               | Red variegated green | Range  | 159.62–958.19                                                   | 0.12–21.70                        | 3.34–32.53                                                      | 103.10–360.05                                                   |
|                          |                      | Mean   | 443.29 <sup>a</sup>                                             | 5.77 <sup>c</sup>                 | 15.47 <sup>b</sup>                                              | 200.64 <sup>a</sup>                                             |
|                          |                      | CV (%) | 40.90                                                           | 99.82                             | 47.47                                                           | 29.68                                                           |
|                          | Dark green           | Range  | 253.18–698.92                                                   | 0.81–33.69                        | 6.94–44.57                                                      | 107.44–351.45                                                   |
|                          |                      | Mean   | 451.48 <sup>a</sup>                                             | 14.22 <sup>a</sup>                | 21.73 <sup>ab</sup>                                             | 215.02 <sup>a</sup>                                             |
|                          |                      | CV (%) | 30.27                                                           | 59.06                             | 47.17                                                           | 24.12                                                           |
|                          | Green                | Range  | 176.09–958.19                                                   | 0.37–40.42                        | 1.03–48.75                                                      | 75.20–298.15                                                    |
|                          |                      | Mean   | 469.36 <sup>a</sup>                                             | 11.02 <sup>ab</sup>               | 20.70 <sup>ab</sup>                                             | 196.00 <sup>a</sup>                                             |
|                          |                      | CV (%) | 36.07                                                           | 75.23                             | 45.89                                                           | 22.17                                                           |
|                          | Light green          | Range  | 221.55–861.67                                                   | 0.19–38.80                        | 7.28–49.22                                                      | 97.11–284.10                                                    |
|                          |                      | Mean   | 483.26 <sup>a</sup>                                             | 8.21 <sup>bc</sup>                | 22.65 <sup>a</sup>                                              | 190.05 <sup>a</sup>                                             |
|                          |                      | CV (%) | 36.94                                                           | 111.29                            | 43.66                                                           | 27.24                                                           |
|                          | Red                  | Range  | 212.00–744.05                                                   | 0.17–42.30                        | 4.90–38.61                                                      | 100.95–449.61                                                   |
|                          |                      | Mean   | 402.00 <sup>a</sup>                                             | 8.29 <sup>bc</sup>                | 20.23 <sup>ab</sup>                                             | 215.36 <sup>a</sup>                                             |
|                          |                      | CV (%) | 34.33                                                           | 113.76                            | 42.73                                                           | 30.05                                                           |
| Seed coat color          |                      | NS     | ***                                                             | NS                                | NS                                                              |                                                                 |
| Flower color             | <i>P</i> -value      | *      | .                                                               | .                                 | **                                                              |                                                                 |
| Leaf color               |                      | NS     | ***                                                             | *                                 | .                                                               |                                                                 |

TPC: total polyphenol content; DPPH: DPPH radical scavenging activity; ABTS: ABTS radical scavenging activity; CV: coefficient of variation;

Values in the same column marked by different superscript letters are significantly different ( $p < 0.05$ );

NS, ., \*, \*\*, \*\*\* represent not significant or significant at  $P < 0.1, 0.05, 0.01, 0.001$ , respectively.

**Table S2.** Principal component analysis of the phytochemicals, antioxidant activities, and agricultural traits of 289 accessions in nine *Amaranthus* species, with eigenvalues and individual and cumulative contributions of variables in the first five principal components.

| Variable        | PC1   | PC2   | PC3   | PC4   | PC5   |
|-----------------|-------|-------|-------|-------|-------|
| TPC             | 1.01  | 3.98  | 0.24  | 24.36 | 56.60 |
| Rutin           | 8.90  | 24.24 | 2.23  | 0.28  | 0.03  |
| DPPH            | 5.98  | 27.78 | 0.50  | 1.47  | 0.43  |
| ABTS            | 2.74  | 22.03 | 0.33  | 2.70  | 15.74 |
| LL              | 12.45 | 0.14  | 19.15 | 11.66 | 2.11  |
| LW              | 9.82  | 3.30  | 21.24 | 11.91 | 2.65  |
| PL              | 18.12 | 8.46  | 1.15  | 4.09  | 0.68  |
| PW              | 16.37 | 5.15  | 2.16  | 8.05  | 5.79  |
| FD              | 10.16 | 0.10  | 14.50 | 12.12 | 5.55  |
| HD              | 0.24  | 0.29  | 35.50 | 17.44 | 8.79  |
| MD              | 14.21 | 4.53  | 3.02  | 5.92  | 1.63  |
| Eigenvalue      | 3.40  | 1.90  | 1.49  | 1.19  | 0.92  |
| Variability (%) | 30.91 | 17.30 | 13.59 | 10.82 | 8.40  |
| Cumulative (%)  | 30.91 | 48.21 | 61.79 | 72.62 | 81.01 |

TPC: total phenolic content; DPPH: DPPH radical scavenging activity; ABTS: ABTS radical scavenging activity; LL: leaf length; LW: leaf width; PL: panicle length; PW: panicle width; FD: days to 50% flowering; HD: days to 50% heading; MD: days to maturity.

**Table S3.** Statistical parameters achieved by PLS-DA.

| Variable  | Loadings |          | VIP    | Groups                    | Q2      |         |
|-----------|----------|----------|--------|---------------------------|---------|---------|
|           | t1       | t2       |        |                           | t1      | t2      |
| TPC       | -0.1502  | 0.0496   | 0.4221 | <i>A. blitum</i>          | 0.0647  | -0.0050 |
| Rutin     | -0.2151  | 0.4874   | 1.0703 | <i>A. caudatus</i>        | 0.0243  | -0.0071 |
| DPPH      | -0.1282  | 0.2986   | 0.6505 | <i>A. cruentus</i>        | 0.0014  | 0.1013  |
| ABTS      | -0.1329  | 0.4526   | 0.9081 | <i>A. hybridus</i>        | -0.0093 | -0.0001 |
| LL        | -0.5309  | 0.2179   | 1.5096 | <i>A. hypochondriacus</i> | 0.0735  | 0.0149  |
| LW        | -0.4095  | 0.118    | 1.1448 | <i>A. powellii</i>        | 0.0517  | -0.0014 |
| PL        | 0.3355   | 0.1849   | 0.9905 | <i>A. quitensis</i>       | -0.0034 | -0.0041 |
| PW        | 0.0008   | 0.3332   | 0.6165 | <i>A. spinosus</i>        | 0.1675  | 0.0009  |
| FD        | -0.3641  | -0.2343  | 1.0989 | <i>A. tricolor</i>        | -0.0057 | -0.0062 |
| HD        | -0.3063  | -0.2592  | 0.9773 |                           |         |         |
| MD        | -0.3294  | -0.3713  | 1.1469 |                           |         |         |
| Component | R2X      | R2X(cum) | R2Y    | R2Y(cum)                  |         |         |
| t1        | 0.3035   | 0.3035   | 0.0512 | 0.0512                    |         |         |
| t2        | 0.1601   | 0.4636   | 0.0231 | 0.0743                    |         |         |

TPC: total phenolic content; DPPH: DPPH radical scavenging activity; ABTS: ABTS radical scavenging activity; LL: leaf length; LW: leaf width; PL: panicle length; PW: panicle width; FD: days to 50% flowering; HD: days to 50% heading; MD: days to maturity; VIP: variable importance for projection; Q2: quality of loo cross-validation; R2X: Fraction of X variation modeled in that component; R2Y: Fraction of Y variation modeled in that component; cum: cumulative.

**Table S4.** Average cluster values of agricultural traits, phytochemicals, and antioxidant activities of 289 accessions of *Amaranthus*.

| Group           | No. Acc.           | TPC<br>( $\mu\text{g}\cdot\text{GAE}/\text{mg}\cdot\text{DE}$ ) | Rutin<br>( $\text{mg}/\text{g}$ ) | DPPH<br>( $\mu\text{g}\cdot\text{TE}/\text{mg}\cdot\text{DE}$ ) | ABTS<br>( $\mu\text{g}\cdot\text{TE}/\text{mg}\cdot\text{DE}$ ) | LL<br>(cm)           |
|-----------------|--------------------|-----------------------------------------------------------------|-----------------------------------|-----------------------------------------------------------------|-----------------------------------------------------------------|----------------------|
| 1               | 112                | $417.70 \pm 182.16^b$                                           | $3.69 \pm 2.87^c$                 | $14.39 \pm 7.26^c$                                              | $176.54 \pm 44.98^c$                                            | $16.79 \pm 6.45^b$   |
| 2               | 74                 | $497.86 \pm 148.50^a$                                           | $18.22 \pm 8.61^a$                | $27.39 \pm 7.86^a$                                              | $237.89 \pm 52.27^a$                                            | $23.84 \pm 4.44^a$   |
| 3               | 103                | $467.70 \pm 149.27^{ab}$                                        | $11.12 \pm 7.07^b$                | $21.47 \pm 8.45^b$                                              | $200.33 \pm 39.23^b$                                            | $23.56 \pm 4.15^a$   |
| <i>P</i> -value |                    | **                                                              | ***                               | ***                                                             | ***                                                             | ***                  |
|                 | LW (cm)            | PL (cm)                                                         | PW (cm)                           | FD (day)                                                        | HD (day)                                                        | MD (day)             |
| 1               | $9.93 \pm 4.23^b$  | $9.27 \pm 6.19^a$                                               | $1.15 \pm 0.72^a$                 | $48.20 \pm 9.01^b$                                              | $64.60 \pm 5.30^b$                                              | $83.48 \pm 7.31^b$   |
| 2               | $12.66 \pm 3.38^a$ | $6.03 \pm 4.79^b$                                               | $1.03 \pm 0.69^a$                 | $51.24 \pm 7.90^b$                                              | $67.00 \pm 4.27^b$                                              | $83.78 \pm 9.23^b$   |
| 3               | $13.02 \pm 2.04^a$ | $3.20 \pm 2.87^c$                                               | $0.93 \pm 0.68^a$                 | $68.93 \pm 10.32^a$                                             | $81.45 \pm 12.37^a$                                             | $123.50 \pm 20.00^a$ |
| <i>P</i> -value | ***                | ***                                                             | NS                                | ***                                                             | ***                                                             | ***                  |

TPC: total phenolic content; DPPH: DPPH radical scavenging activity; ABTS: ABTS radical scavenging activity; LL: leaf length; LW: leaf width; PL: panicle length; PW: panicle width; FD: days to 50% flowering; HD: days to 50% heading; MD: days to maturity;

Values in the same column marked by different superscript letters are significantly different ( $p < 0.05$ );

NS, \*\*, \*\*\* represent not significant or significant at  $P < 0.01$ , 0.001, respectively.

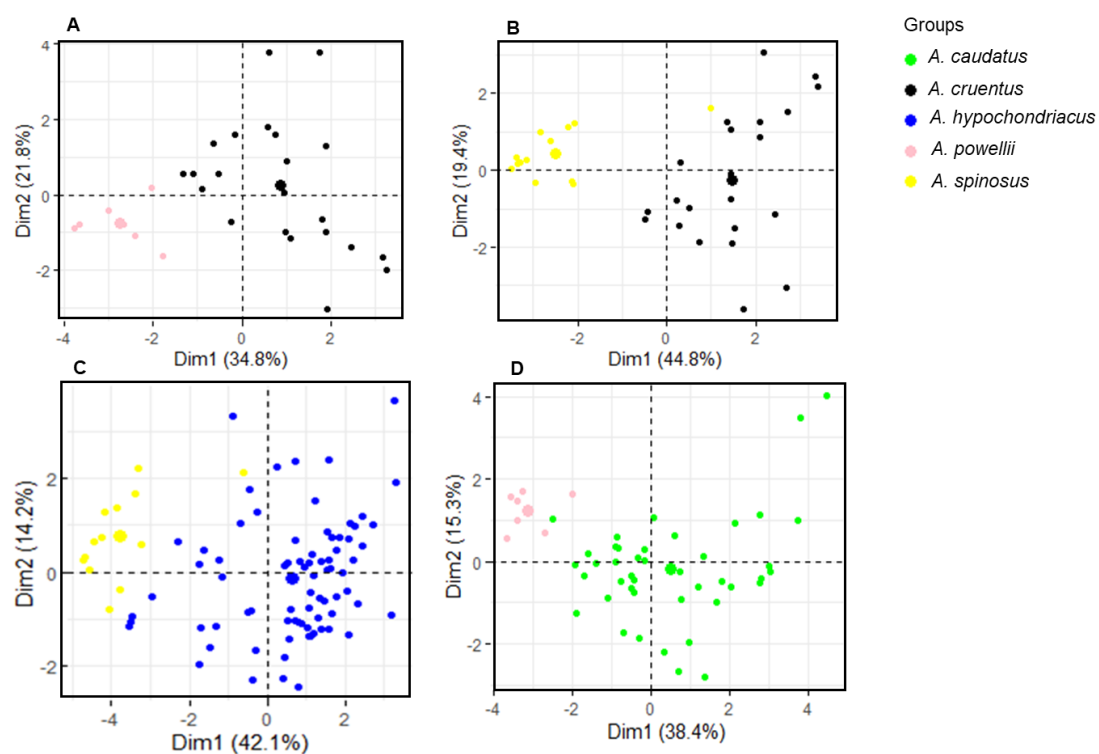

**Figure S1.** Principal component biplot for *Amaranthus* species based on their agricultural traits, phytochemical content, and antioxidant activities using the entire data set. (A) Loading plots of variables of *A. powellii* and *A. cruentus*. (B) Loading plots of variables of *A. spinosus* and *A. cruentus*. (C) Loading plots of variables of *A. hypochondriacus* and *A. spinosus*. (D) Loading plots of variables of *A. powellii* and *A. caudatus*.

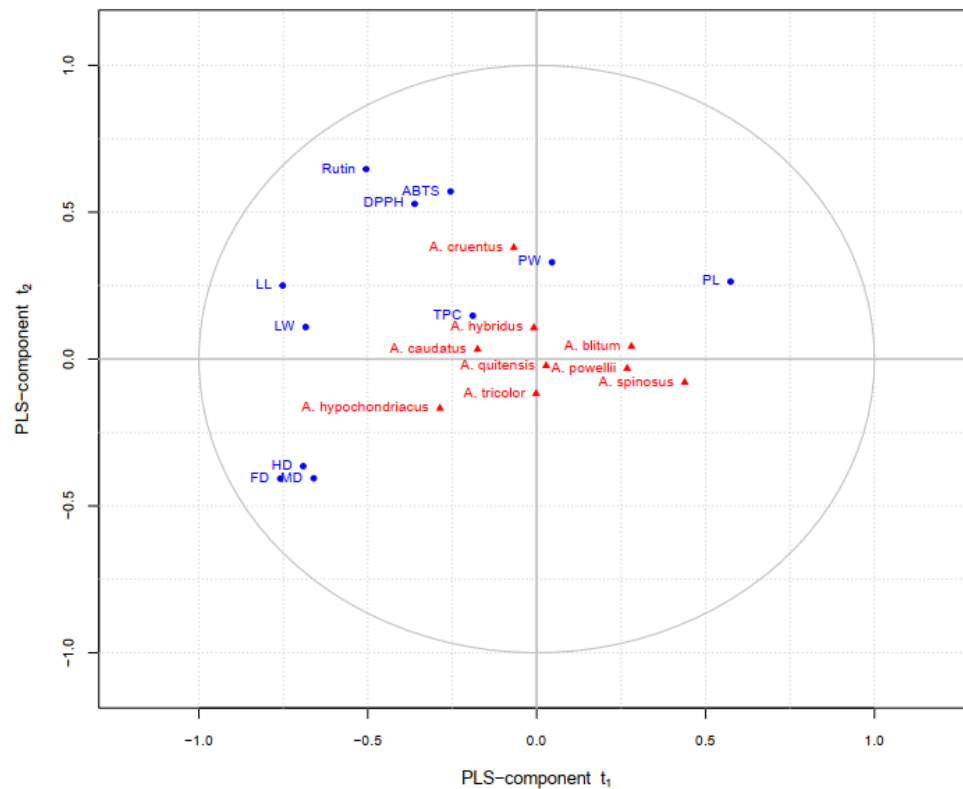

**Figure S2.** PLS discriminant analysis between agricultural traits, and phytochemical content and antioxidant activities using the entire data set. TPC = total phenolic content, DPPH = DPPH radical scavenging activity, ABTS = ABTS radical scavenging activity, LL = leaf length, LW = leaf width, PL = panicle length, PW = panicle width, FD = days to 50% flowering, HD = days to 50% heading, MD = days to maturity.
